# Supplementary material
Source: publisher figshare collection journal article supplement (https://springernature.figshare.com/ndownloader/files/14738705)
Supplement: Supplementary file 1 [file 14738705]

## Sheet: Sheet1
Supplementary Table 4. Functional and Pathway Enrichment of Upstream Regulators of MS4A1
Category	Term	Count	%	Genes	p-value	FDR (%)
GOTERM_BP_FAT	GO:0032583~regulation of gene-specific transcription	6	60	IL4, TFE3, TGFB3, SPI1, IRF4, BCOR	1.07996e-08	1.49624e-05
GOTERM_BP_FAT	GO:0006357~regulation of transcription from RNA polymerase II promoter	8	80	GATA1, IL4, TFE3, IRF8, TGFB3, SPI1, IRF4, BCOR	4.12165e-08	5.71036e-05
GOTERM_BP_FAT	GO:0043193~positive regulation of gene-specific transcription	5	50	IL4, TFE3, TGFB3, SPI1, IRF4	1.96182e-07	0.000271802
GOTERM_BP_FAT	GO:0006355~regulation of transcription, DNA-dependent	9	90	GATA1, IL4, TFE3, IRF8, POU2F2, TGFB3, SPI1, IRF4, BCOR	6.83134e-07	0.000946449
GOTERM_BP_FAT	GO:0051252~regulation of RNA metabolic process	9	90	GATA1, IL4, TFE3, IRF8, POU2F2, TGFB3, SPI1, IRF4, BCOR	8.14472e-07	0.00112841
GOTERM_BP_FAT	GO:0045449~regulation of transcription	9	90	GATA1, IL4, TFE3, IRF8, POU2F2, TGFB3, SPI1, IRF4, BCOR	1.38211e-05	0.0191469
GOTERM_BP_FAT	GO:0045893~positive regulation of transcription, DNA-dependent	5	50	IL4, TFE3, TGFB3, SPI1, IRF4	0.000167011	0.231139
GOTERM_BP_FAT	GO:0051254~positive regulation of RNA metabolic process	5	50	IL4, TFE3, TGFB3, SPI1, IRF4	0.000172493	0.238717
GOTERM_BP_FAT	GO:0045941~positive regulation of transcription	5	50	IL4, TFE3, TGFB3, SPI1, IRF4	0.000318544	0.440426
GOTERM_BP_FAT	GO:0010628~positive regulation of gene expression	5	50	IL4, TFE3, TGFB3, SPI1, IRF4	0.000356982	0.493451
GOTERM_BP_FAT	GO:0045935~positive regulation of nucleobase, nucleoside, nucleotide and nucleic acid metabolic process	5	50	IL4, TFE3, TGFB3, SPI1, IRF4	0.000469138	0.648015
GOTERM_BP_FAT	GO:0051173~positive regulation of nitrogen compound metabolic process	5	50	IL4, TFE3, TGFB3, SPI1, IRF4	0.000529158	0.730638
GOTERM_BP_FAT	GO:0010557~positive regulation of macromolecule biosynthetic process	5	50	IL4, TFE3, TGFB3, SPI1, IRF4	0.000561162	0.774669
GOTERM_BP_FAT	GO:0031328~positive regulation of cellular biosynthetic process	5	50	IL4, TFE3, TGFB3, SPI1, IRF4	0.000669276	0.923275
GOTERM_BP_FAT	GO:0009891~positive regulation of biosynthetic process	5	50	IL4, TFE3, TGFB3, SPI1, IRF4	0.000707144	0.975277
GOTERM_BP_FAT	GO:0006350~transcription	7	70	GATA1, TFE3, IRF8, POU2F2, SPI1, IRF4, BCOR	0.000765245	1.05502
GOTERM_BP_FAT	GO:0045637~regulation of myeloid cell differentiation	3	30	IL4, TFE3, SPI1	0.000928153	1.27827
GOTERM_BP_FAT	GO:0045944~positive regulation of transcription from RNA polymerase II promoter	4	40	IL4, TFE3, TGFB3, IRF4	0.00151961	2.08492
GOTERM_BP_FAT	GO:0010604~positive regulation of macromolecule metabolic process	5	50	IL4, TFE3, TGFB3, SPI1, IRF4	0.00155805	2.13712
GOTERM_BP_FAT	GO:0010551~regulation of specific transcription from RNA polymerase II promoter	3	30	TFE3, IRF4, BCOR	0.00166603	2.28366
GOTERM_MF_FAT	GO:0030528~transcription regulator activity	7	70	GATA1, TFE3, IRF8, POU2F2, SPI1, IRF4, BCOR	5.61704e-05	0.050425
GOTERM_MF_FAT	GO:0003700~transcription factor activity	6	60	GATA1, TFE3, IRF8, POU2F2, SPI1, IRF4	0.00010929	0.0980906
GOTERM_MF_FAT	GO:0043565~sequence-specific DNA binding	5	50	GATA1, TFE3, IRF8, POU2F2, SPI1	0.000284847	0.255478
KEGG_PATHWAY	hsa04672:Intestinal immune network for IgA production	2	20	IL4, TGFB3	0.0191814	13.7057
